# Supplementary material for: Synergistic catalysis: highly diastereoselective benzoxazole addition to Morita–Baylis–Hillman carbonates
Source: Royal Society of Chemistry journal article supplement (doi:10.1039/c4cc00728j), 2014-01-01
Supplement: c4cc00728j1.pdf [file c4cc00728j1.pdf]

## X-ray Crystallography

Single-crystal X-ray diffraction data of **3i** were collected at 100 K on Rigaku AFC12 goniometer equipped with an enhanced sensitivity (HG) Saturn 724+ detector mounted at the window of an FR-E+ Superbright MoK $\alpha$  rotating anode generator with HF Varimax optics [1].

Unit cell parameters were refined against all data. An empirical absorption correction was carried out using CrystalClear [2] software.

The crystal structure of **3i** was solved by direct methods and refined on  $F_o^2$  by full-matrix least-squares refinements using programs of the SHELX-2013 software [3]. All non-hydrogen atoms were refined with anisotropic displacement parameters. All hydrogen atoms were added at calculated positions and refined using a riding model with isotropic displacement parameters based on the equivalent isotropic displacement parameter ( $U_{eq}$ ) of the parent atom.

Crystallographic data (excluding structure factors) for the structures in this paper have been deposited with the Cambridge Crystallographic Data Centre; CCDC deposition number 978247 contains the supplementary crystallographic data for this paper. This data can be obtained free of charge from The Cambridge Crystallographic Data Centre via [www.ccdc.cam.ac.uk/data\\_request/cif](http://www.ccdc.cam.ac.uk/data_request/cif).

**Table S1.** Crystal data and structure refinement details for crystal structure of **3i**.

|                                          |                                                              |                            |
|------------------------------------------|--------------------------------------------------------------|----------------------------|
| Empirical formula                        | $C_{20}H_{17}BrN_2O_5$                                       |                            |
| Formula weight                           | 445.26                                                       |                            |
| Temperature                              | 100(2) K                                                     |                            |
| Wavelength                               | 0.71075 Å                                                    |                            |
| Crystal system                           | Triclinic                                                    |                            |
| Space group                              | $P-1$                                                        |                            |
| Unit cell dimensions                     | $a = 8.9971(4)$ Å                                            | $\alpha = 70.132(5)^\circ$ |
|                                          | $b = 10.0949(4)$ Å                                           | $\beta = 68.095(5)^\circ$  |
|                                          | $c = 11.5631(8)$ Å                                           | $\gamma = 80.935(6)^\circ$ |
| Volume                                   | $915.83(9)$ Å <sup>3</sup>                                   |                            |
| Z                                        | 2                                                            |                            |
| Density (calculated)                     | $1.615$ Mg / m <sup>3</sup>                                  |                            |
| Absorption coefficient                   | $2.280$ mm <sup>-1</sup>                                     |                            |
| $F(000)$                                 | 452                                                          |                            |
| Crystal                                  | Plate; Colourless                                            |                            |
| Crystal size                             | $0.240 \times 0.200 \times 0.040$ mm <sup>3</sup>            |                            |
| $\theta$ range for data collection       | $3.194 - 27.477^\circ$                                       |                            |
| Index ranges                             | $-11 \leq h \leq 11, -13 \leq k \leq 13, -14 \leq l \leq 14$ |                            |
| Reflections collected                    | 12120                                                        |                            |
| Independent reflections                  | 4167 [ $R_{int} = 0.0244$ ]                                  |                            |
| Completeness to $\theta = 25.242^\circ$  | 99.6 %                                                       |                            |
| Absorption correction                    | Semi-empirical from equivalents                              |                            |
| Max. and min. transmission               | 1.000 and 0.672                                              |                            |
| Refinement method                        | Full-matrix least-squares on $F^2$                           |                            |
| Data / restraints / parameters           | 4167 / 0 / 255                                               |                            |
| Goodness-of-fit on $F^2$                 | 1.082                                                        |                            |
| Final R indices [ $F^2 > 2\sigma(F^2)$ ] | $R1 = 0.0257, wR2 = 0.0675$                                  |                            |
| R indices (all data)                     | $R1 = 0.0273, wR2 = 0.0684$                                  |                            |
| Extinction coefficient                   | n/a                                                          |                            |
| Largest diff. peak and hole              | $0.455$ and $-0.431$ e Å <sup>-3</sup>                       |                            |

<sup>1</sup> S.J Coles and P.A. Gale, (2012) Chemical Science, (3), 683-689.

<sup>2</sup> CrystalClear-SM Expert 3.1 b26 (Rigaku, 20112).

<sup>3</sup> SHELX-2013 - G. Sheldrick, G.M. (2008), Acta Cryst. A64, 112-122.
